# Supplementary material for: Porphyromonas gingivalis lipopolysaccharide promotes T-hel per17 cell differentiation by upregulating Delta-like ligand 4 expression on CD14+ monocytes
Source: PeerJ. 2021 Apr 23;9:e11094. doi: 10.7717/peerj.11094 (PMC8074840; doi:10.7717/peerj.11094)
Supplement: Supplemental Information 1 [file peerj-09-11094-s001.xlsx]

## Sheet: 工作表1
	BETA-ACTIN	IL-17
B1:1	22.87	33.71	-10.84	0.00054555
	22.49	33.7	-11.21	0.000422137
	22.68	33.705	-11.025	0.000483844	1.82865
LPS1:1	22.47	34.3	-11.83	0.000274672
	21.99	33.93	-11.94	0.000254508
	22.23	34.115	-11.885	0.00026459	1
B1:5	22.62	34.55	-11.93	0.000256278
	22.18	33.97	-11.79	0.000282395
	22.4	34.26	-11.86	0.000269337	1
LPS1:5	23.88	34.34	-10.46	0.000709948
	24.27	36.75	-12.48	0.000175043
	24.075	35.545	-11.47	0.000442495	1.64291
B1:10	26.21	35.78	-9.57	0.00131566
	25.91	35.48	-9.57	0.00131566
	26.06	35.63	-9.57	0.00131566	1
LPS1:10
	29.81	36.44	-6.63	0.0100965
	29.81	36.44	-6.63	0.0100965	7.67411
B1:1	20.51	32.61	-12.1	0.000227791
	20.52	32.25	-11.73	0.000294387
	20.515	32.43	-11.915	0.000261089	2.05606
LPS 1:1	19.76	32.78	-13.02	0.00012039
	19.71	32.58	-12.87	0.000133581
	19.735	32.68	-12.945	0.000126985	1
b 1:5	19.56	32.17	-12.61	0.00015996
	19.25	32.34	-13.09	0.000114688
	19.405	32.255	-12.85	0.000137324	1
lps15	20.77	32.13	-11.36	0.000380451
	20.66	32.3	-11.64	0.000313336
	20.715	32.215	-11.5	0.000346894	2.5261
B 1:10	23.51	33.3	-9.79	0.00112958
	23.28	32.89	-9.61	0.00127968
	23.395	33.095	-9.7	0.00120463	1
LPS 1:10	26.72	33.18	-6.46	0.0113592
	26.86	33.74	-6.88	0.00849012
	26.79	33.46	-6.67	0.00992464	8.23875
	BETA-ACTIN	RORC
B1:1	22.87	33.1	-10.23	0.000832651
	22.49	32.69	-10.2	0.000850147
	22.68	32.895	-10.215	0.000841399	1.46938
LPS1:1	22.47	33.5	-11.03	0.000478233
	21.99	32.54	-10.55	0.000667012
	22.23	33.02	-10.79	0.000572622	1
B1:5	22.62	31.9	-9.28	0.00160858
	22.18	32.07	-9.89	0.00105393
	22.4	31.985	-9.585	0.00133126	1
LPS1:5	23.88	32.68	-8.8	0.00224355
	24.27	32.74	-8.47	0.00282017
	24.075	32.71	-8.635	0.00253186	1.90186
B1:10	26.21	33.83	-7.62	0.00508337
	25.91	33.67	-7.76	0.00461325
	26.06	33.75	-7.69	0.00484831	1
LPS1:10	29.81	35.79	-5.98	0.0158431
	30.02	36.26	-6.24	0.0132304
	29.915	36.025	-6.11	0.0145368	2.99831
	beta-actin	rorc
B1:1	20.51	31.55	-11.04	0.000474929
	20.52	31.86	-11.34	0.000385762
	20.515	31.705	-11.19	0.00042803	1
LPS 1:1	19.76	31.12	-11.36	0.000380451
	19.71	31.28	-11.57	0.000328914
	19.735	31.2	-11.465	0.000353746	0.82645
b 1:5	19.56	30.25	-10.69	0.000605326
	19.25	30.22	-10.97	0.000498541
	19.405	30.235	-10.83	0.000551934	1
lps15	20.77	30.87	-10.1	0.000911165
	20.66	30.93	-10.27	0.000809882
	20.715	30.9	-10.185	0.000860524	1.55911
B 1:10	23.51	32.54	-9.03	0.00191293
	23.28	32.48	-9.2	0.00170029
	23.395	32.51	-9.115	0.00180661	1
LPS 1:10	26.86	33.28	-6.42	0.0116785
	26.72	33.29	-6.57	0.0105253
	26.79	33.285	-6.495	0.0110869	6.13685
	BETA-ACTIN	RORC
B1:5	29.91	35.11	-5.2	0.0272047
	29.19	35.26	-6.07	0.014885
	29.55	35.185	-5.635	0.0210448	1
lps1:5	28.67	33.55	-4.88	0.0339605
	28.62	33.59	-4.97	0.0319066
	28.645	33.57	-4.925	0.0329335	1.56492
B1:10	23.6	35.9	-12.3	0
	23.52	37.7	-14.18	5.38759e-05
	23.56	36.8	-13.24	0.00012609	1
LPS 1:10	24.43	35.59	-11.16	0.000437024
	24.28	34.7	-10.42	0.000729907
	24.355	35.145	-10.79	0.000583465	4.62738
