# Supplementary material for: Porphyromonas gingivalis lipopolysaccharide promotes T-hel per17 cell differentiation by upregulating Delta-like ligand 4 expression on CD14+ monocytes
Source: PeerJ. 2021 Apr 23;9:e11094. doi: 10.7717/peerj.11094 (PMC8074840; doi:10.7717/peerj.11094)
Supplement: Supplemental Information 2 [file peerj-09-11094-s002.xlsx]

## Sheet: DLL-4
20160608	beta-actin	dll-4
MO 0F	20.69	35.45
	20.52	35.58
	20.82
	20.6767	35.515	-14.8383	3.41363e-05	1
MO 1	20.87	35.6
	20.74
	20.59	34.5
	20.7333	35.05	-14.3167	4.90065e-05	1.43561
	beta-actin	dll-4
	18.71	38.14
	18.81
	18.76	38.14	-19.38	1.46568e-06	1
	18.66	37.76
	18.68
	18.67	37.76	-19.09	1.792e-06	1.22264
	beta-actin	dll-4
	17.57
		28.8
	17.57	28.8	-11.23	0.000416326	1
	17.29	27.23
	17.14
	17.215	27.23	-10.015	0.000966462	2.32141
	19.02	29.76
	19.45	29.94
	19.235	29.85	-10.615	0.000637627	1
	19.66	29.69
	19.73	29.62
	19.695	29.655	-9.96	0.00100402	1.57462

## Sheet: JAGGED-1
20160608	BETA-ACTIN	JAGGED-1
MO 0	20.82	29.69
	20.52
	20.69	29.21
	20.6767	29.45	-8.77333	0.00228541	1
MO 1	20.74	29.1
	20.87	29.12
	20.59	29.05
	20.7333	29.09	-8.35667	0.00305065	1.33484
20161127	BETA-ACTIN	J-1
MO O	17.57	28
		28.19
	17.57	28.095	-10.525	0.000678671	1
MO 1		27.56
	17.14	27.51
	17.14	27.535	-10.395	0.000742665	1.09429
	beta	j-1
MO 0	18.71	26.73
	18.81	26.76
	18.76	26.745
MO-LPS	18.66	26.69	-8.03	0.00382586	1
	18.68
	18.62	26.62
	18.6533	26.655	-8.00167	0.00390174	1.01983
MO 0	21.66	31.64
	21.85	31.29
	21.755	31.465	-9.71	0.00119398	1
MO-LPS	20.98	30.25
	20.52
	20.75	30.25	-9.5	0.00138107	1.15669
