# Supplementary material for: Porphyromonas gingivalis lipopolysaccharide promotes T-hel per17 cell differentiation by upregulating Delta-like ligand 4 expression on CD14+ monocytes
Source: PeerJ. 2021 Apr 23;9:e11094. doi: 10.7717/peerj.11094 (PMC8074840; doi:10.7717/peerj.11094)
Supplement: Supplemental Information 4 [file peerj-09-11094-s004.xlsx]

## Sheet: 工作表1
	beta-actin	IL-17	RORC
	18.12	29.21	-11.09	0.000458751	1
	17.88	29.03	-11.15	0.000440064	0.959264
	17.71	28.77	-11.06	0.000468391	A
	17.9033	29.0033	-11.1	0.000455583	1
	17.54	28.65	-11.11	0.000452436	0.993092
	17.24	28.51	-11.27	0.000404941	0.888843
	17.31	28.23	-10.92	0.000516122	1.13288
	17.3633	28.4633	-11.1	0.000455583	1
	17.05	28.01	-10.96	0.000502009	1.10191
	17.04	28.25	-11.21	0.000422137	0.926588
	17.045	28.13	-11.085	0.000460344	1.01045
	16.62	27.07	-10.45	0.000714886	1.56917
	16.62	27.44	-10.82	0.000553166	1.21419
	16.62	27.255	-10.635	0.000628848	1.38032
			-10.635
	18.12	28.92	-10.6967
	17.88	28.93	-10.6556
	17.71	28.9	-10.6624
	17.9033	28.9167	-11.0133	0.000483789	1
	17.54	28.28	-10.74	0.000584706
	17.24	28.06	-10.82	0.000553166
	17.31	28.04	-10.73	0.000588773
	17.3633	28.1267	-10.7633	0.000575326	1.18921
		28.57	-28.57	2.50942e-09
	17.05	28.54	-11.49	0.000347669
	17.04	28.13	-11.09	0.000458751
	17.045	28.4133	-11.3683	0.00037826	0.78187
	16.62	27.92	-11.3	0.000396608	0.819794
	16.62	28.06	-11.44	0.000359929	0.743979
	16.62	27.99	-11.37	0.000377823	0.780967
	beta-actin
	16.92	28.51
	17.16	28.34
	17.04	28.425	-11.385	0.000373916
				1	1
	16.15	27.59	-11.44	0.000359929
	16.78	27.85	-11.07	0.000465155
	16.465	27.72	-11.255	0.000409173
	16.06	27.87	-11.81	0.000278507	0.000278507
	16.48	27.49	-11.01	0.000484908
	16.27	27.68	-11.41	0.000367492
	16.57	26.81	-10.24	0.0008269
	16.09	26.69	-10.6	0.000644291	0.000644291
IL-17	16.33	26.75	-10.42	0.000729907
TRANS	20.56	32.23	-11.67	0.000306888
	20.51	32.06	-11.55	0.000333506
	20.535	32.145	-11.61	0.00031992	1
Trans-LPS	19.88	30.92	-11.04	0.000474929	1.48452
	19.64	30.99	-11.35	0.000383098	1.19748
	19.76	30.955	-11.195	0.000426549	1.3333
TRANS	20.56	30.85	-10.29	0.000798732
	20.51	30.95	-10.44	0.000719858
	20.535	30.9	-10.365	0.00075827	1
Trans-LPS	19.88	30	-10.12	0.000898621	1.18509
	19.64	29.88	-10.24	0.0008269	1.09051
	19.76	29.94	-10.18	0.000862015	1.13682
2
	18.18	30.07
	18.01	29.07
	17.97	29.25
	18.0533	29.4633	-11.41	0.000367492	0.484645
	17.81	28.65
	17.6	28.72
	17.71	28.85
	17.7067	28.74	-11.0333	0.000477129	0.629233
	18.3	28.89
	18.48	28.77
	17.65	28.71
	18.1433	28.79	-10.6467	0.000623784	0.82264
	17.93	27.22
	17.2	27.65
	16.87	27.26
	17.3333	27.3767	-10.0433	0.000947666	1.24977
	beta-actin	IL-17
	20.92	31.83
	20.64	32.1
	20.62	31.85
TRANS	20.7267	31.9267	-11.2	0.000425074	1
	19.72	30.92
	19.64	30.78
	19.68	30.95
	19.68	30.8833	-11.2033	0.000424093	0.997692
	20.66	31.9
	20.72	32.11
	20.54	32.07
	20.64	32.0267	-11.3867	0.000373484	1
	20.44	31.53
	19.72	31.56
		31.3
	20.08	31.4633	-11.3833	0.000374348	1.00231
	beta-actin	RORC
	20.92	31.14
	20.64	31.1
	20.62
	20.7267	31.12	-10.3933	0.000743524	1
	19.72	30.34
	19.64	30.56
	19.68	30.26
	19.68	30.3867	-10.7067	0.000598373	0.80478
	20.66	30.9
	20.72	31.55
	20.54
	20.64	31.225	-10.585	0.000651025	1
	20.44	30.58
	19.72	30.71
	20.08	30.645	-10.565	0.000660113	1.01396
