# Supplementary material for: Porphyromonas gingivalis lipopolysaccharide promotes T-hel per17 cell differentiation by upregulating Delta-like ligand 4 expression on CD14+ monocytes
Source: PeerJ. 2021 Apr 23;9:e11094. doi: 10.7717/peerj.11094 (PMC8074840; doi:10.7717/peerj.11094)
Supplement: Supplemental Information 5 [file peerj-09-11094-s005.xls]

## Sheet: Sheet6
Application: Tecan i-Control				Tecan i-Control , 1.3.3.0
Device: infinite 200				Serial number: 707003730				Serial number of connected stacker:
Firmware: V_2.02_11/06_InfiniTe (Dec 13 2006/16.18.16)				MAI, V_2.02_11/06_InfiniTe (Dec 13 2006/16.18.16)
Date:	2016-12-21
Time:	23:12:50
System				PC-201508131539
User				PC-201508131539\mei
Plate				Corning 96 Flat bottom Transparent Polystyrol [COS96ft.pdfx]
														0.8216	400
Label: Label1														0.5244	200
Mode				Absorbance										0.2212	50
Wavelength				450	nm									0.1727	25
Bandwidth				9	nm									0.1543	12.5
Number of Reads				25										0.134	6.25
Settle Time				0	ms									0.1183	0
Part of Plate				A1-H2
Start Time:	23:12:50
	Temperature: 27.8 °C			8倍
<>	1	2
A	0.8488	0.6968
B	1.1124	0.7116				First
C	0.7751	0.8063			transwell	0.3777	0.3779	0.3808	0.3811	0.3809	0.37968
D	0.8832	0.685				0.298	0.2978	0.3006	0.3009	0.3008	0.29962	0.33965	117.606	588.032
E	0.7502	0.3777
F	1.3429	0.298			co-culture	0.473	0.4731	0.4769	0.4774	0.4773	0.47554
G	0.7936	0.473				0.6855	0.6853	0.6911	0.691	0.6911	0.6888	0.6888	313.284	1566.42
H	0.9773	0.6855
					trans	second	0.44055	0.4401	0.4401	0.44025	173.987	869.934
					co-culture		0.5194	0.5178	0.5187	0.518633	217.916	1089.58
End Time:	23:13:07
						third
					trans		0.75775	0.7569	0.75565	0.756767	351.375	702.751
					co-culture		0.84925	0.84945	0.8505	0.849733	403.478	806.955
						forth
					trans		0.2374	60.3015	723.617
							0.2446	64.3366	772.039	747.828
					mo-lps		0.3266	110.293	1323.51
					first	mo	0.43565	171.409	1199.86
0.9773	474.971	2849.83				mo-lps	0.6354	283.357	1983.5
0.7502	347.695	2086.17
						anti-dll-4-5	0.2374	60.3015	723.617
0.6968	317.768	1906.61				anti-dll-4-10	0.2383	60.8059	729.67
0.7116	326.062	1956.37
0.685	311.154	1866.93
					thrid	mo	0.7079	323.988	1619.94			MO	0.3266	110.293	1323.51
													0.286	87.5388	1050.47	1186.99
						mo-lps	0.7684	357.895	357.895	1789.48		mo-LPS	0.4912	202.541	2430.49	2430.49
							0.8217	387.767	372.831	1864.15
												5ug	0.2374	60.3015	723.617
						5ug	0.7779	363.219	363.219	1816.1			0.2446	64.3366	772.039	747.828
							0.7809	364.901	364.06	1820.3
												10ug	0.2383	60.8059	729.67
						10ug							0.2333	58.0037	696.044	712.857
							0.7582	352.179	352.179	1760.89

## Sheet: Sheet5
Application: Tecan i-Control				Tecan i-Control , 1.3.3.0
Device: infinite 200				Serial number: 707003730				Serial number of connected stacker:
Firmware: V_2.02_11/06_InfiniTe (Dec 13 2006/16.18.16)				MAI, V_2.02_11/06_InfiniTe (Dec 13 2006/16.18.16)
Date:	2016-12-21
Time:	23:12:07
System				PC-201508131539
User				PC-201508131539\mei
Plate				Corning 96 Flat bottom Transparent Polystyrol [COS96ft.pdfx]
Label: Label1
Mode				Absorbance
Wavelength				450	nm
Bandwidth				9	nm
Number of Reads				25
Settle Time				0	ms
Part of Plate				A1-H2
Start Time:	23:12:07
	Temperature: 27.4 °C
<>	1	2
A	0.8479	0.697
B	1.1132	0.7131
C	0.7759	0.8073
D	0.8827	0.6859
E	0.7505	0.3779
F	1.3425	0.2978
G	0.7944	0.4731
H	0.9775	0.6853
End Time:	23:12:24

## Sheet: Sheet4
Application: Tecan i-Control				Tecan i-Control , 1.3.3.0
Device: infinite 200				Serial number: 707003730				Serial number of connected stacker:
Firmware: V_2.02_11/06_InfiniTe (Dec 13 2006/16.18.16)				MAI, V_2.02_11/06_InfiniTe (Dec 13 2006/16.18.16)
Date:	2016-12-21
Time:	23:10:50
System				PC-201508131539
User				PC-201508131539\mei
Plate				Corning 96 Flat bottom Transparent Polystyrol [COS96ft.pdfx]
Label: Label1
Mode				Absorbance
Wavelength				450	nm
Bandwidth				9	nm
Number of Reads				25
Settle Time				0	ms
Part of Plate				A1-H2
Start Time:	23:10:50
	Temperature: 27.6 °C
<>	1	2
A	0.847	0.7068
B	1.1208	0.7179
C	0.7813	0.8148
D	0.8901	0.6918
E	0.7562	0.3808
F	1.3539	0.3006
G	0.8011	0.4769
H	0.9857	0.6911
End Time:	23:11:07

## Sheet: Sheet3
Application: Tecan i-Control				Tecan i-Control , 1.3.3.0
Device: infinite 200				Serial number: 707003730				Serial number of connected stacker:
Firmware: V_2.02_11/06_InfiniTe (Dec 13 2006/16.18.16)				MAI, V_2.02_11/06_InfiniTe (Dec 13 2006/16.18.16)
Date:	2016-12-21
Time:	23:10:24
System				PC-201508131539
User				PC-201508131539\mei
Plate				Corning 96 Flat bottom Transparent Polystyrol [COS96ft.pdfx]
Label: Label1
Mode				Absorbance
Wavelength				450	nm
Bandwidth				9	nm
Number of Reads				25
Settle Time				0	ms
Part of Plate				A1-H2
Start Time:	23:10:24
	Temperature: 27.6 °C
<>	1	2
A	0.8421	0.7083
B	1.1211	0.7185
C	0.7814	0.8156
D	0.8913	0.6921
E	0.7568	0.3811
F	1.3538	0.3009
G	0.801	0.4774
H	0.985	0.691
End Time:	23:10:41

## Sheet: Sheet2
Application: Tecan i-Control				Tecan i-Control , 1.3.3.0
Device: infinite 200				Serial number: 707003730				Serial number of connected stacker:
Firmware: V_2.02_11/06_InfiniTe (Dec 13 2006/16.18.16)				MAI, V_2.02_11/06_InfiniTe (Dec 13 2006/16.18.16)
Date:	2016-12-21
Time:	23:09:57
System				PC-201508131539
User				PC-201508131539\mei
Plate				Corning 96 Flat bottom Transparent Polystyrol [COS96ft.pdfx]
Label: Label1
Mode				Absorbance
Wavelength				450	nm
Bandwidth				9	nm
Number of Reads				25
Settle Time				0	ms
Part of Plate				A1-H2
Start Time:	23:09:57
	Temperature: 27.8 °C
<>	1	2
A	0.8389	0.7084
B	1.1215	0.718
C	0.7799	0.8152
D	0.8907	0.6914
E	0.7562	0.3809
F	1.3551	0.3008
G	0.8009	0.4773
H	0.9863	0.6911
End Time:	23:10:14
